# Supplementary material
Source: publisher site journal article supplement (https://www.dovepress.com/article/311081)

**Supplementary figures and legends**

**Supplementary Figure 1** Scatterplots and regression lines reflecting the linear correlations between MUAC and grip strength (blue circle and solid line for men; red triangle and dotted line for women). Abbreviations: MUAC, mid-upper arm circumference.


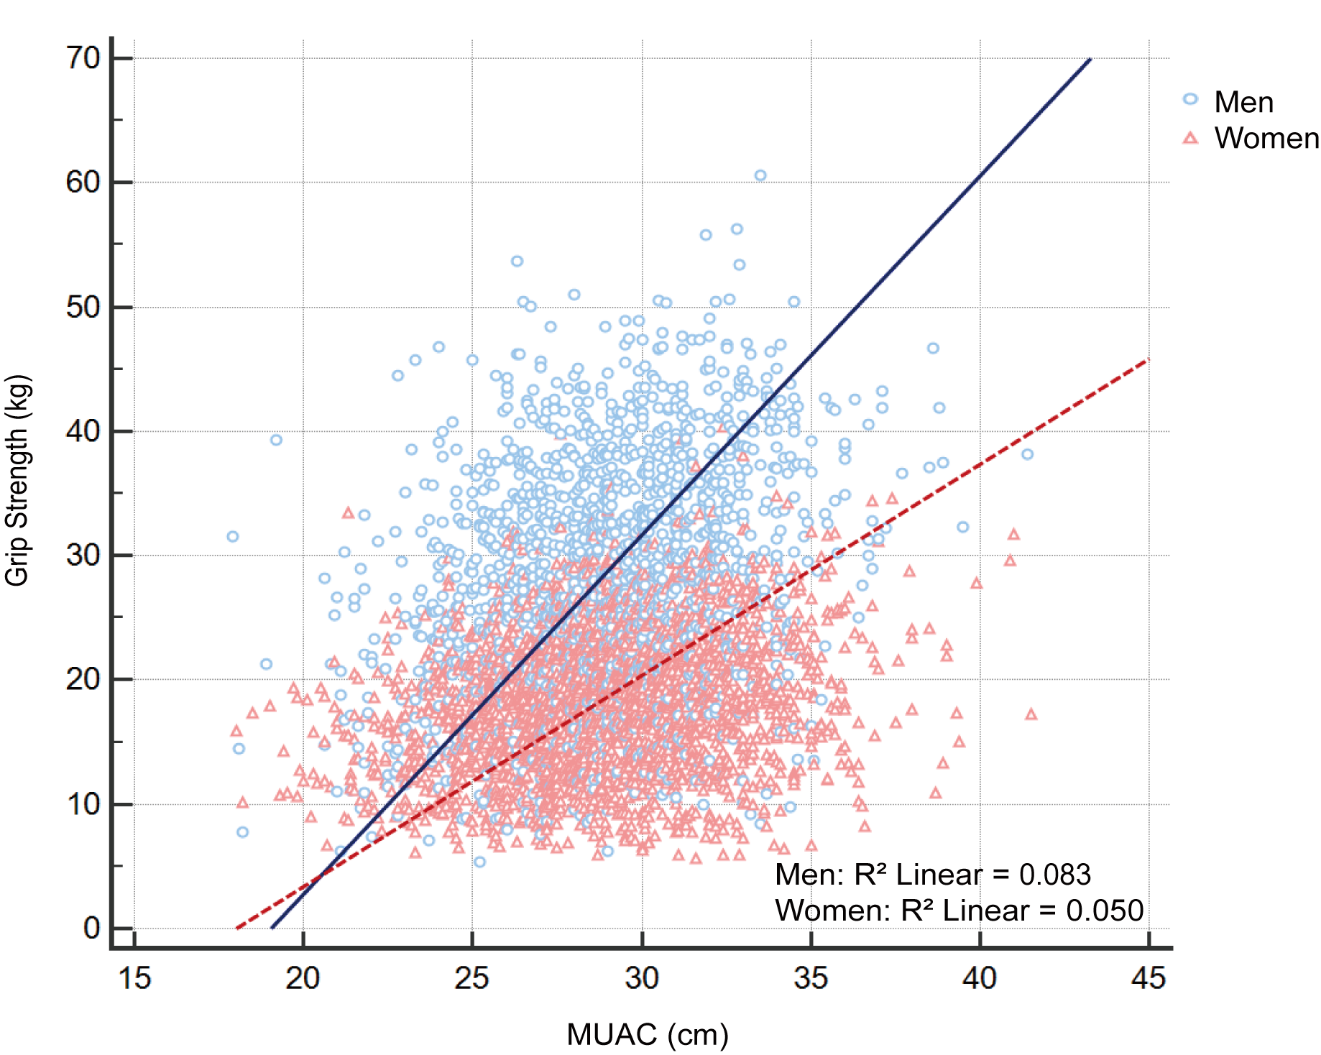


**Supplementary Figure 2** Receiver operating characteristic curves and 95% confidence intervals of mid-upper arm circumference for diagnosing low appendicular skeletal muscle mass index against the AWGS2019 ((A) men, (B) women) and EWGSOP2 ((C) men, (D) women). Dotted lines reflect 95% CIs. Abbreviations: CI, Confidence interval; AWGS2019, Asian Working Group for Sarcopenia 2019; EWGSOP2, European Working Group on Sarcopenia in Older People 2.


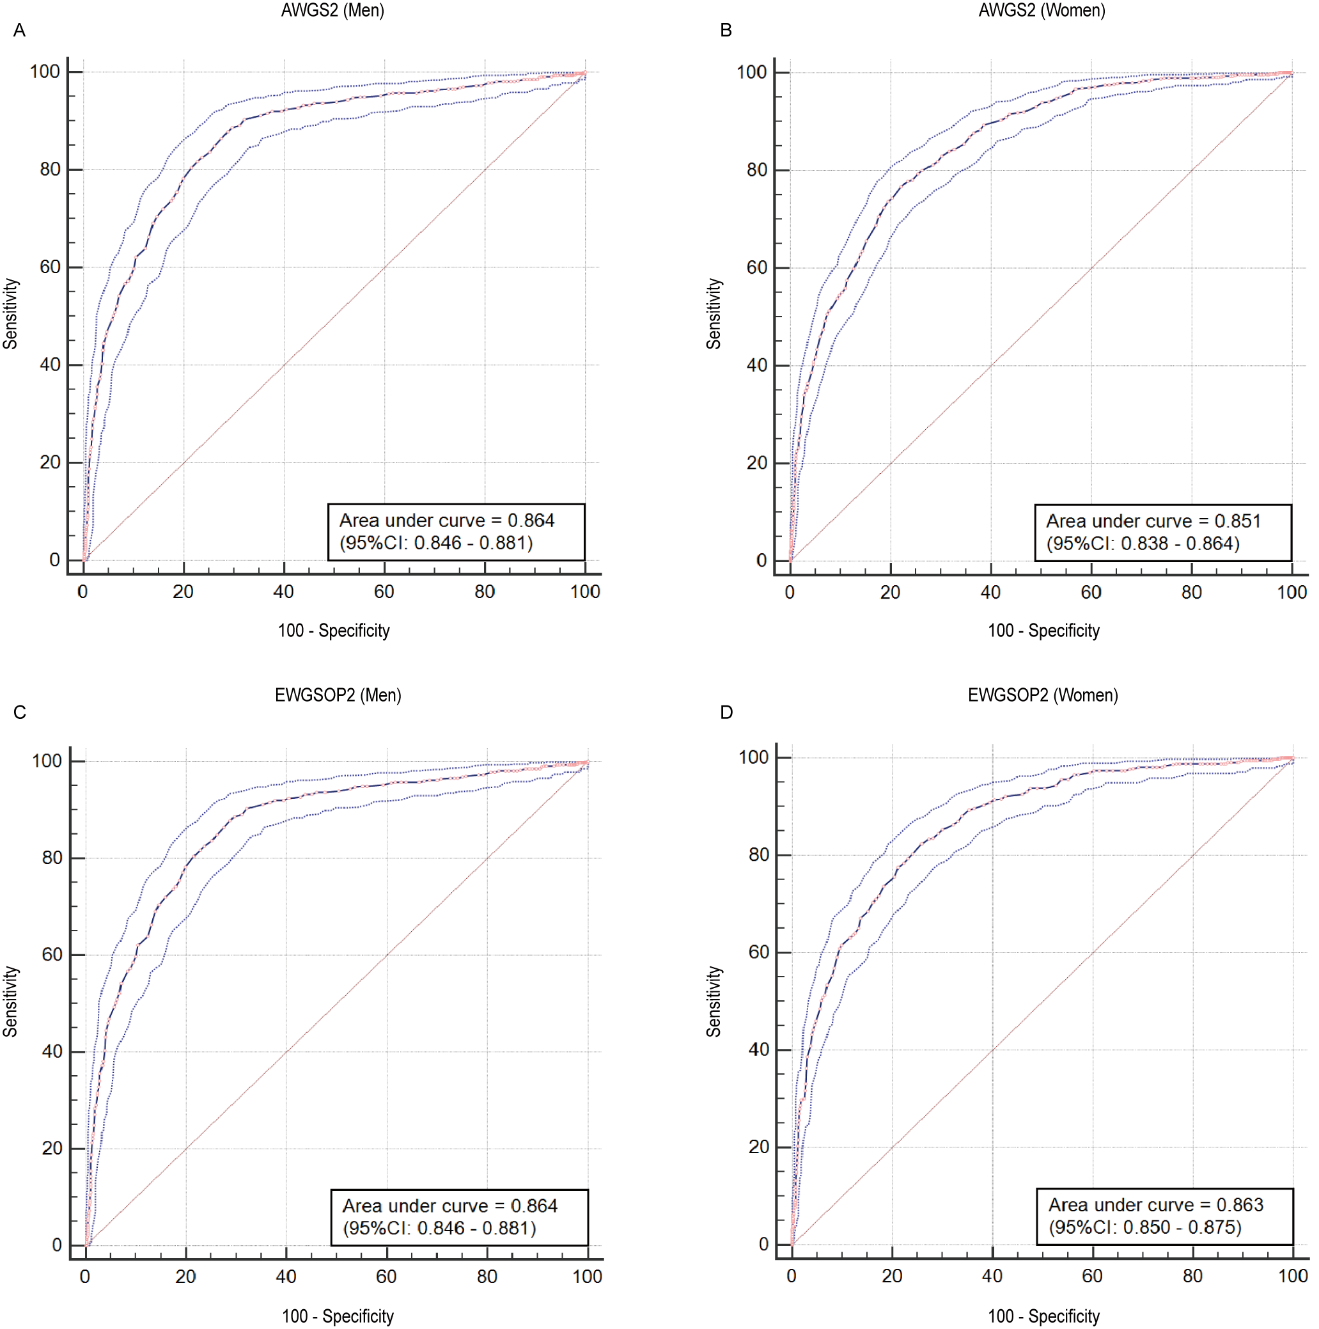

Supplement: Supplementary file 1 [file get_supplementary_file.php]
